# Supplementary material for: Direct surface analysis mass spectrometry uncovers the vertical distribution of cuticle-associated metabolites in plants
Source: Royal Society of Chemistry journal article supplement (doi:10.1039/d2ra07166e), 2023-01-01
Supplement: d2ra07166e1.pdf [file d2ra07166e1.pdf]

Supporting Information for

## Direct surface analysis mass spectrometry uncovers the vertical distribution of cuticle-associated metabolites in plants

Siriél Saladin,<sup>a</sup> Sara D’Aronco,<sup>a</sup> Gwyneth Ingram,<sup>b</sup> Chiara Giorio<sup>a</sup>

<sup>a</sup>. Yusuf Hamied Department of Chemistry, University of Cambridge, Lensfield Road, Cambridge CB2 1EW, United Kingdom

<sup>b</sup>. Laboratoire Reproduction et Développement des Plantes, ENS de Lyon, CNRS, INRAE, UCBL, F-69342, Lyon, France

**Table S-1** Different solvents have different ionization efficiencies. Hence, comparison between different extraction solvents is only feasible if the extracts are diluted to a defined ionization solvent prior to infusion into the MS. This was achieved as described in this table for the data of the subsection ‘Polar metabolites on cuticle surface’ (*B. napus*, Fig. 2). ACN:water 50:50 (0.1 % FA and 0.1 mg L<sup>-1</sup> IS) was used as a solvent blank.

| Extraction solvent                                                    | Diluted with                                                          | Dilution factor | Ionization solvent                                          |
|-----------------------------------------------------------------------|-----------------------------------------------------------------------|-----------------|-------------------------------------------------------------|
| 0.5 mL of water<br>(0.1 % FA and 0.1 mg L <sup>-1</sup> IS)           | 0.5 mL of ACN<br>(0.1 % FA and 0.1 mg L <sup>-1</sup> IS)             | 2               | ACN:water 50:50<br>(0.1 % FA and 0.1 mg L <sup>-1</sup> IS) |
| 0.5 mL of ACN:water 50:50<br>(0.1 % FA and 0.1 mg L <sup>-1</sup> IS) | 0.5 mL of ACN:water 50:50<br>(0.1 % FA and 0.1 mg L <sup>-1</sup> IS) |                 |                                                             |
| 0.5 mL of ACN:water 90:10<br>(0.1 % FA and 0.1 mg L <sup>-1</sup> IS) | 0.5 mL of ACN:water 10:90<br>(0.1 % FA and 0.1 mg L <sup>-1</sup> IS) |                 |                                                             |

**Table S-2** Different solvents have different ionization efficiencies. Hence, comparison between different extraction solvents is only feasible if the extracts are diluted to a defined ionization solvent prior to infusion into the MS. This was achieved as described in this table for the data of the subsection ‘Delipidation’ (*B. napus*, Fig. 4). ACN:CHCl<sub>3</sub>:water 49:49:2 (0.002 % FA and 0.1 mg L<sup>-1</sup> IS) was used as a solvent blank.

| Extraction solvent                                                                                      | Diluted with                                                                                                              | Dilution factor | Ionization solvent                                                                            |
|---------------------------------------------------------------------------------------------------------|---------------------------------------------------------------------------------------------------------------------------|-----------------|-----------------------------------------------------------------------------------------------|
| 0.5 mL of ACN<br>(0.002 % FA and 0.1 mg L <sup>-1</sup> IS)                                             | 0.5 mL of CHCl <sub>3</sub> and 0.02 mL of H <sub>2</sub> O<br>(both containing 0.002 % FA and 0.1 mg L <sup>-1</sup> IS) | 2               | ACN:CHCl <sub>3</sub> :H <sub>2</sub> O 49:49:2<br>(0.002 % FA and 0.1 mg L <sup>-1</sup> IS) |
| 0.5 mL of ACN:CHCl <sub>3</sub> :H <sub>2</sub> O 49:49:2<br>(0.002 % FA and 0.1 mg L <sup>-1</sup> IS) | 0.5 mL of ACN:CHCl <sub>3</sub> :H <sub>2</sub> O 49:49:2<br>(0.002 % FA and 0.1 mg L <sup>-1</sup> IS)                   |                 |                                                                                               |
| 0.5 mL of CHCl <sub>3</sub><br>(0.002 % FA and 0.1 mg L <sup>-1</sup> IS)                               | 0.5 mL of ACN and 0.02 mL of H <sub>2</sub> O<br>(both containing 0.002 % FA and 0.1 mg L <sup>-1</sup> IS)               |                 |                                                                                               |

**Table S-3** List of selected chemical formulas that have been found with high (++) intensity (> 100 000 a.u.), low (+) intensity (> 1 000 a.u.) or that have barely or not (-) been found (< 1 000 a.u.) in *Brassica napus* and *Arabidopsis thaliana* (Col-0). Random artificial molecules are listed at the bottom of the table. The detected absence of these unexpected molecules supports the validity of the approach used for the identification of the chemical formulas. Cotyledons were extracted for 60 seconds with ACN/water 90:10 with 0.1 % formic acid and analysed with HRMS in negative ion mode. Fatty acids showed low ionization efficiencies under these conditions and are therefore not listed.

| Molecular formula (neutral)                                   | Theoretical mass [M-H] <sup>-</sup> | Class      | Tentative assignment  | <i>B. napus</i> | <i>A. thaliana</i> | MS <sup>2</sup> fragments |
|---------------------------------------------------------------|-------------------------------------|------------|-----------------------|-----------------|--------------------|---------------------------|
| C <sub>6</sub> H <sub>13</sub> NO <sub>2</sub>                | 130.08735                           | Amino acid | (Iso)leucine          | +               | +                  |                           |
| C <sub>3</sub> H <sub>7</sub> NO <sub>2</sub>                 | 88.04040                            | Amino acid | Alanine               | +               | +                  |                           |
| C <sub>6</sub> H <sub>14</sub> N <sub>4</sub> O <sub>2</sub>  | 173.10440                           | Amino acid | Arginine              | -               | -                  |                           |
| C <sub>4</sub> H <sub>8</sub> N <sub>2</sub> O <sub>3</sub>   | 131.04622                           | Amino acid | Asparagine            | +               | +                  |                           |
| C <sub>4</sub> H <sub>7</sub> NO <sub>4</sub>                 | 132.03023                           | Amino acid | Aspartic acid         | +               | +                  |                           |
| C <sub>3</sub> H <sub>7</sub> NSO <sub>2</sub>                | 120.01247                           | Amino acid | Cysteine              | -               | -                  |                           |
| C <sub>5</sub> H <sub>9</sub> NO <sub>4</sub>                 | 146.04588                           | Amino acid | Glutamic acid         | +               | +                  |                           |
| C <sub>5</sub> H <sub>10</sub> N <sub>2</sub> O <sub>3</sub>  | 145.06187                           | Amino acid | Glutamine             | ++              | ++                 | 127.05<br>109.04          |
| C <sub>6</sub> H <sub>9</sub> N <sub>3</sub> O <sub>2</sub>   | 154.06220                           | Amino acid | Histidine             | -               | -                  |                           |
| C <sub>6</sub> H <sub>14</sub> N <sub>2</sub> O <sub>2</sub>  | 145.09825                           | Amino acid | Lysine                | -               | -                  |                           |
| C <sub>5</sub> H <sub>11</sub> NSO <sub>2</sub>               | 148.04377                           | Amino acid | Methionine            | -               | -                  |                           |
| C <sub>9</sub> H <sub>11</sub> NO <sub>2</sub>                | 164.07170                           | Amino acid | Phenylalanine         | -               | -                  |                           |
| C <sub>5</sub> H <sub>9</sub> NO <sub>2</sub>                 | 114.05605                           | Amino acid | Proline               | +               | +                  |                           |
| C <sub>3</sub> H <sub>7</sub> NO <sub>3</sub>                 | 104.03532                           | Amino acid | Serine                | +               | +                  |                           |
| C <sub>4</sub> H <sub>9</sub> NO <sub>3</sub>                 | 118.05097                           | Amino acid | Threonine             | +               | +                  |                           |
| C <sub>11</sub> H <sub>12</sub> N <sub>2</sub> O <sub>2</sub> | 203.08260                           | Amino acid | Tryptophan            | -               | -                  |                           |
| C <sub>9</sub> H <sub>11</sub> NO <sub>3</sub>                | 180.06662                           | Amino acid | Tyrosine              | -               | -                  |                           |
| C <sub>5</sub> H <sub>11</sub> NO <sub>2</sub>                | 116.07170                           | Amino acid | Valine                | +               | +                  |                           |
| C <sub>10</sub> H <sub>12</sub> O <sub>4</sub>                | 195.06628                           | Aromatic   | Acetosyringone        | -               | -                  |                           |
| C <sub>12</sub> H <sub>16</sub> O <sub>9</sub>                | 303.07216                           | Aromatic   | Benzenetetrol-glucose | -               | -                  |                           |
| C <sub>7</sub> H <sub>6</sub> O <sub>2</sub>                  | 121.02950                           | Aromatic   | Benzoic acid          | -               | -                  |                           |

|                                                 |           |          |                              |    |    |                            |
|-------------------------------------------------|-----------|----------|------------------------------|----|----|----------------------------|
| C <sub>9</sub> H <sub>8</sub> O <sub>4</sub>    | 179.03498 | Aromatic | Caffeic acid                 | -  | -  |                            |
| C <sub>15</sub> H <sub>18</sub> O <sub>9</sub>  | 341.08781 | Aromatic | Caffeoyl-glucose             | -  | -  |                            |
| C <sub>13</sub> H <sub>12</sub> O <sub>8</sub>  | 295.04594 | Aromatic | Caffeoyl-malate              | -  | -  |                            |
| C <sub>16</sub> H <sub>18</sub> O <sub>9</sub>  | 353.08781 | Aromatic | Caffeoyl-quinat              | -  | -  |                            |
| C <sub>16</sub> H <sub>16</sub> O <sub>8</sub>  | 335.07724 | Aromatic | Caffeoyl-shikimate           | -  | -  |                            |
| C <sub>13</sub> H <sub>14</sub> O <sub>8</sub>  | 297.06159 | Aromatic | Caffeoyl-threonate           | -  | -  |                            |
| C <sub>10</sub> H <sub>12</sub> O <sub>3</sub>  | 179.07137 | Aromatic | Canolol                      | -  | -  |                            |
| C <sub>6</sub> H <sub>6</sub> O <sub>2</sub>    | 109.02950 | Aromatic | Catechol                     | -  | -  |                            |
| C <sub>9</sub> H <sub>8</sub> O <sub>2</sub>    | 147.04515 | Aromatic | Cinnamic acid                | -  | -  |                            |
| C <sub>15</sub> H <sub>18</sub> O <sub>7</sub>  | 309.09798 | Aromatic | Cinnamoyl-glucose            | -  | -  |                            |
| C <sub>13</sub> H <sub>12</sub> O <sub>6</sub>  | 263.05611 | Aromatic | Cinnamoyl-malate             | -  | -  |                            |
| C <sub>16</sub> H <sub>18</sub> O <sub>7</sub>  | 321.09798 | Aromatic | Cinnamoyl-quinat             | -  | -  |                            |
| C <sub>16</sub> H <sub>16</sub> O <sub>6</sub>  | 303.08741 | Aromatic | Cinnamoyl-shikimate          | -  | -  |                            |
| C <sub>13</sub> H <sub>14</sub> O <sub>6</sub>  | 265.07176 | Aromatic | Cinnamoyl-threonate          | -  | -  |                            |
| C <sub>10</sub> H <sub>12</sub> O <sub>3</sub>  | 179.07137 | Aromatic | Coniferyl alcohol            | -  | -  |                            |
| C <sub>9</sub> H <sub>8</sub> O <sub>3</sub>    | 163.04007 | Aromatic | Coumaric acid                | -  | -  |                            |
| C <sub>15</sub> H <sub>18</sub> O <sub>8</sub>  | 325.09289 | Aromatic | Coumaroyl-glucose            | -  | -  |                            |
| C <sub>13</sub> H <sub>12</sub> O <sub>7</sub>  | 279.05103 | Aromatic | Coumaroyl-malate             | -  | -  |                            |
| C <sub>16</sub> H <sub>18</sub> O <sub>8</sub>  | 337.09289 | Aromatic | Coumaroyl-quinat             | -  | -  |                            |
| C <sub>16</sub> H <sub>16</sub> O <sub>7</sub>  | 319.08233 | Aromatic | Coumaroyl-shikimate          | -  | -  |                            |
| C <sub>13</sub> H <sub>14</sub> O <sub>7</sub>  | 281.06668 | Aromatic | Coumaroyl-threonate          | -  | -  |                            |
| C <sub>11</sub> H <sub>12</sub> O <sub>4</sub>  | 207.06628 | Aromatic | Dimethoxycinnamic acid       | -  | -  |                            |
| C <sub>17</sub> H <sub>22</sub> O <sub>9</sub>  | 369.11911 | Aromatic | Dimethoxycinnamoyl-glucose   | -  | -  |                            |
| C <sub>15</sub> H <sub>16</sub> O <sub>8</sub>  | 323.07724 | Aromatic | Dimethoxycinnamoyl-malate    | -  | -  |                            |
| C <sub>18</sub> H <sub>22</sub> O <sub>9</sub>  | 381.11911 | Aromatic | Dimethoxycinnamoyl-quinat    | -  | -  |                            |
| C <sub>18</sub> H <sub>20</sub> O <sub>8</sub>  | 363.10854 | Aromatic | Dimethoxycinnamoyl-shikimate | -  | -  |                            |
| C <sub>15</sub> H <sub>18</sub> O <sub>8</sub>  | 325.09289 | Aromatic | Dimethoxycinnamoyl-threonate | -  | -  |                            |
| C <sub>10</sub> H <sub>10</sub> O <sub>4</sub>  | 193.05063 | Aromatic | Ferulic acid                 | -  | -  |                            |
| C <sub>16</sub> H <sub>20</sub> O <sub>9</sub>  | 355.10346 | Aromatic | Feruloyl-glucose             | -  | +  |                            |
| C <sub>14</sub> H <sub>14</sub> O <sub>8</sub>  | 309.06159 | Aromatic | Feruloyl-malate              | +  | -  |                            |
| C <sub>26</sub> H <sub>40</sub> O <sub>6</sub>  | 447.27521 | Aromatic | Feruloyl-palmitic acid       | -  | -  |                            |
| C <sub>17</sub> H <sub>20</sub> O <sub>9</sub>  | 367.10346 | Aromatic | Feruloyl-quinat              | -  | -  |                            |
| C <sub>17</sub> H <sub>18</sub> O <sub>8</sub>  | 349.09289 | Aromatic | Feruloyl-shikimate           | -  | -  |                            |
| C <sub>14</sub> H <sub>16</sub> O <sub>8</sub>  | 311.07724 | Aromatic | Feruloyl-threonate           | -  | -  |                            |
| C <sub>7</sub> H <sub>6</sub> O <sub>5</sub>    | 169.01425 | Aromatic | Gallic acid                  | -  | -  |                            |
| C <sub>10</sub> H <sub>10</sub> O <sub>5</sub>  | 209.04555 | Aromatic | Hydroxyferulic acid          | -  | -  |                            |
| C <sub>16</sub> H <sub>20</sub> O <sub>10</sub> | 371.09837 | Aromatic | Hydroxyferuloyl-glucose      | -  | -  |                            |
| C <sub>14</sub> H <sub>14</sub> O <sub>9</sub>  | 325.05651 | Aromatic | Hydroxyferuloyl-malate       | -  | -  |                            |
| C <sub>17</sub> H <sub>20</sub> O <sub>10</sub> | 383.09837 | Aromatic | Hydroxyferuloyl-quinat       | -  | -  |                            |
| C <sub>17</sub> H <sub>18</sub> O <sub>9</sub>  | 365.08781 | Aromatic | Hydroxyferuloyl-shikimate    | -  | -  |                            |
| C <sub>14</sub> H <sub>16</sub> O <sub>9</sub>  | 327.07216 | Aromatic | Hydroxyferuloyl-threonate    | -  | -  |                            |
| C <sub>10</sub> H <sub>10</sub> O <sub>3</sub>  | 177.05572 | Aromatic | Methoxycinnamic acid         | -  | -  |                            |
| C <sub>16</sub> H <sub>20</sub> O <sub>8</sub>  | 339.10854 | Aromatic | Methoxycinnamoyl-glucose     | -  | -  |                            |
| C <sub>14</sub> H <sub>14</sub> O <sub>7</sub>  | 293.06668 | Aromatic | Methoxycinnamoyl-malate      | -  | -  |                            |
| C <sub>17</sub> H <sub>20</sub> O <sub>8</sub>  | 351.10854 | Aromatic | Methoxycinnamoyl-quinat      | -  | -  |                            |
| C <sub>17</sub> H <sub>18</sub> O <sub>7</sub>  | 333.09798 | Aromatic | Methoxycinnamoyl-shikimate   | -  | -  |                            |
| C <sub>14</sub> H <sub>16</sub> O <sub>7</sub>  | 295.08233 | Aromatic | Methoxycinnamoyl-threonate   | -  | -  |                            |
| C <sub>6</sub> H <sub>6</sub> O <sub>3</sub>    | 125.02442 | Aromatic | Pyrogallol                   | -  | -  |                            |
| C <sub>18</sub> H <sub>16</sub> O <sub>8</sub>  | 359.07724 | Aromatic | Rosmarinic acid              | -  | -  |                            |
| C <sub>13</sub> H <sub>16</sub> O <sub>8</sub>  | 299.07724 | Aromatic | Salicyl-glucose              | -  | -  |                            |
| C <sub>11</sub> H <sub>12</sub> O <sub>4</sub>  | 207.06628 | Aromatic | Sinapaldehyde                | -  | -  |                            |
| C <sub>11</sub> H <sub>12</sub> O <sub>5</sub>  | 223.06120 | Aromatic | Sinapinic acid               | ++ | ++ | 164.05<br>208.04<br>149.02 |
| C <sub>17</sub> H <sub>22</sub> O <sub>10</sub> | 385.11402 | Aromatic | Sinapoyl-glucose             | +  | ++ | 223.06<br>205.05<br>190.02 |
| C <sub>15</sub> H <sub>16</sub> O <sub>9</sub>  | 339.07216 | Aromatic | Sinapoyl-malate              | ++ | ++ | 223.06<br>133.01<br>183.01 |
| C <sub>27</sub> H <sub>42</sub> O <sub>7</sub>  | 477.28578 | Aromatic | Sinapoyl-palmitic acid       | -  | -  |                            |
| C <sub>18</sub> H <sub>22</sub> O <sub>10</sub> | 397.11402 | Aromatic | Sinapoyl-quinat              | -  | -  |                            |
| C <sub>18</sub> H <sub>20</sub> O <sub>9</sub>  | 379.10346 | Aromatic | Sinapoyl-shikimate           | -  | -  |                            |
| C <sub>15</sub> H <sub>18</sub> O <sub>9</sub>  | 341.08781 | Aromatic | Sinapoyl-threonate           | -  | -  |                            |
| C <sub>11</sub> H <sub>14</sub> O <sub>4</sub>  | 209.08193 | Aromatic | Sinapyl alcohol              | -  | -  |                            |
| C <sub>9</sub> H <sub>10</sub> O <sub>4</sub>   | 181.05063 | Aromatic | Syringaldehyde               | -  | -  |                            |
| C <sub>9</sub> H <sub>10</sub> O <sub>5</sub>   | 197.04555 | Aromatic | Syringic acid                | -  | -  |                            |
| C <sub>8</sub> H <sub>10</sub> O <sub>3</sub>   | 153.05572 | Aromatic | Syringol                     | -  | -  |                            |
| C <sub>13</sub> H <sub>18</sub> O <sub>8</sub>  | 301.09289 | Aromatic | Tachioside                   | -  | -  |                            |

|                                                                 |           |              |                                          |    |    |                           |
|-----------------------------------------------------------------|-----------|--------------|------------------------------------------|----|----|---------------------------|
| C <sub>9</sub> H <sub>8</sub> O <sub>5</sub>                    | 195.02990 | Aromatic     | Trihydroxycinnamic acid                  | -  | -  |                           |
| C <sub>15</sub> H <sub>18</sub> O <sub>10</sub>                 | 357.08272 | Aromatic     | Trihydroxycinnamoyl-glucose              | -  | -  |                           |
| C <sub>13</sub> H <sub>12</sub> O <sub>9</sub>                  | 311.04086 | Aromatic     | Trihydroxycinnamoyl-malate               | -  | -  |                           |
| C <sub>16</sub> H <sub>18</sub> O <sub>10</sub>                 | 369.08272 | Aromatic     | Trihydroxycinnamoyl-quinat               | -  | -  |                           |
| C <sub>16</sub> H <sub>16</sub> O <sub>9</sub>                  | 351.07216 | Aromatic     | Trihydroxycinnamoyl-shikimate            | -  | -  |                           |
| C <sub>13</sub> H <sub>14</sub> O <sub>9</sub>                  | 313.05651 | Aromatic     | Trihydroxycinnamoyl-threonate            | -  | -  |                           |
| C <sub>12</sub> H <sub>14</sub> O <sub>5</sub>                  | 237.07685 | Aromatic     | Trimethoxycinnamic acid                  | -  | -  |                           |
| C <sub>18</sub> H <sub>24</sub> O <sub>10</sub>                 | 399.12967 | Aromatic     | Trimethoxycinnamoyl-glucose              | -  | -  |                           |
| C <sub>16</sub> H <sub>18</sub> O <sub>9</sub>                  | 353.08781 | Aromatic     | Trimethoxycinnamoyl-malate               | -  | -  |                           |
| C <sub>19</sub> H <sub>24</sub> O <sub>10</sub>                 | 411.12967 | Aromatic     | Trimethoxycinnamoyl-quinat               | -  | -  |                           |
| C <sub>19</sub> H <sub>22</sub> O <sub>9</sub>                  | 393.11911 | Aromatic     | Trimethoxycinnamoyl-shikimate            | -  | -  |                           |
| C <sub>16</sub> H <sub>20</sub> O <sub>9</sub>                  | 355.10346 | Aromatic     | Trimethoxycinnamoyl-threonate            | -  | -  |                           |
| C <sub>8</sub> H <sub>8</sub> O <sub>4</sub>                    | 167.03498 | Aromatic     | Vanillic acid                            | -  | -  |                           |
| C <sub>8</sub> H <sub>8</sub> O <sub>3</sub>                    | 151.04007 | Aromatic     | Vanillin                                 | -  | -  |                           |
| C <sub>14</sub> H <sub>18</sub> O <sub>9</sub>                  | 329.08781 | Aromatic     | Vanilloyl-glucose                        | -  | -  |                           |
| C <sub>9</sub> H <sub>10</sub> O <sub>5</sub>                   | 197.04555 | Aromatic     | α-Hydroxyhydrocaffeic acid               | -  | -  |                           |
| C <sub>5</sub> H <sub>10</sub> O <sub>4</sub>                   | 133.05063 | Sugar        | Deoxyribose                              | +  | +  |                           |
| C <sub>12</sub> H <sub>22</sub> O <sub>11</sub>                 | 341.10894 | Sugar        | Dihexose                                 | +  | +  |                           |
| C <sub>6</sub> H <sub>12</sub> O <sub>6</sub>                   | 179.05611 | Sugar        | Hexose                                   | ++ | ++ |                           |
| C <sub>5</sub> H <sub>10</sub> O <sub>5</sub>                   | 149.04555 | Sugar        | Pentose                                  | +  | +  |                           |
| C <sub>15</sub> H <sub>12</sub> O <sub>8</sub>                  | 319.04594 | Flavonoid    | Dihydrogossypetin                        | -  | -  |                           |
| C <sub>15</sub> H <sub>10</sub> O <sub>8</sub>                  | 317.03029 | Flavonoid    | Gossypetin                               | -  | -  |                           |
| C <sub>21</sub> H <sub>20</sub> O <sub>13</sub>                 | 479.08311 | Flavonoid    | Gossypin                                 | -  | -  |                           |
| C <sub>15</sub> H <sub>10</sub> O <sub>6</sub>                  | 285.04046 | Flavonoid    | Kaempferol                               | -  | -  |                           |
| C <sub>21</sub> H <sub>20</sub> O <sub>12</sub>                 | 463.08820 | Flavonoid    | Myricitrin                               | -  | -  |                           |
| C <sub>15</sub> H <sub>12</sub> O <sub>5</sub>                  | 271.06120 | Flavonoid    | Naringenin                               | -  | -  |                           |
| C <sub>27</sub> H <sub>32</sub> O <sub>14</sub>                 | 579.17193 | Flavonoid    | Naringin                                 | -  | -  |                           |
| C <sub>15</sub> H <sub>10</sub> O <sub>7</sub>                  | 301.03538 | Flavonoid    | Quercetin                                | -  | -  |                           |
| C <sub>15</sub> H <sub>12</sub> O <sub>7</sub>                  | 303.05103 | Flavonoid    | Taxifolin                                | -  | -  |                           |
| C <sub>5</sub> H <sub>5</sub> N <sub>5</sub>                    | 134.04722 | Nucleic acid | Adenine                                  | -  | -  |                           |
| C <sub>4</sub> H <sub>5</sub> N <sub>3</sub> O                  | 110.03599 | Nucleic acid | Cytosine                                 | -  | -  |                           |
| C <sub>5</sub> H <sub>5</sub> N <sub>5</sub> O                  | 150.04213 | Nucleic acid | Guanine                                  | -  | -  |                           |
| C <sub>5</sub> H <sub>6</sub> N <sub>2</sub> O <sub>2</sub>     | 125.03565 | Nucleic acid | Thymine                                  | -  | -  |                           |
| C <sub>4</sub> H <sub>4</sub> N <sub>2</sub> O <sub>2</sub>     | 111.02000 | Nucleic acid | Uracil                                   | -  | -  |                           |
| C <sub>6</sub> H <sub>8</sub> O <sub>6</sub>                    | 175.02481 | Others       | Ascorbic acid                            | ++ | ++ | 115.00<br>87.01<br>113.02 |
| C <sub>6</sub> H <sub>8</sub> O <sub>7</sub>                    | 191.01973 | Others       | Citric acid                              | ++ | ++ | 111.01<br>173.01<br>87.01 |
| C <sub>6</sub> H <sub>6</sub> O <sub>6</sub>                    | 173.00916 | Others       | Dehydroascorbic acid                     | +  | +  |                           |
| C <sub>4</sub> H <sub>4</sub> O <sub>4</sub>                    | 115.00368 | Others       | Fumaric acid                             | +  | +  |                           |
| C <sub>7</sub> H <sub>14</sub> O <sub>8</sub>                   | 225.06159 | Others       | Glucoheptonic acid                       | +  | +  |                           |
| C <sub>6</sub> H <sub>12</sub> O <sub>7</sub>                   | 195.05103 | Others       | Gluconic acid                            | +  | +  |                           |
| C <sub>10</sub> H <sub>17</sub> N <sub>3</sub> SO <sub>6</sub>  | 306.07653 | Others       | Glutathione                              | +  | +  |                           |
| C <sub>3</sub> H <sub>6</sub> O <sub>4</sub>                    | 105.01933 | Others       | Glyceric acid                            | +  | +  |                           |
| C <sub>3</sub> H <sub>8</sub> O <sub>3</sub>                    | 91.04007  | Others       | Glycerol                                 | -  | -  |                           |
| C <sub>5</sub> H <sub>6</sub> O <sub>5</sub>                    | 145.01425 | Others       | Ketoglutaric acid                        | +  | +  |                           |
| C <sub>4</sub> H <sub>4</sub> O <sub>4</sub>                    | 115.00368 | Others       | Maleic acid                              | +  | +  |                           |
| C <sub>4</sub> H <sub>6</sub> O <sub>5</sub>                    | 133.01425 | Others       | Malic acid                               | ++ | ++ | 115.00<br>71.01<br>87.01  |
| C <sub>3</sub> H <sub>4</sub> O <sub>4</sub>                    | 103.00368 | Others       | Malonic acid or<br>3-hydroxyperuvic acid | +  | +  | 59.01                     |
| C <sub>5</sub> H <sub>10</sub> O <sub>4</sub>                   | 133.05063 | Others       | Monoacetylgllycerol                      | -  | +  |                           |
| C <sub>11</sub> H <sub>19</sub> NS <sub>2</sub> O <sub>10</sub> | 388.03776 | Others       | Progointrin                              | ++ | -  |                           |
| C <sub>3</sub> H <sub>4</sub> O <sub>3</sub>                    | 87.00877  | Others       | Pyruvic acid                             | +  | +  |                           |
| C <sub>7</sub> H <sub>12</sub> O <sub>6</sub>                   | 191.05611 | Others       | Quinic acid                              | -  | -  |                           |
| C <sub>7</sub> H <sub>10</sub> O <sub>5</sub>                   | 173.04555 | Others       | Shikimic acid                            | -  | -  |                           |
| C <sub>4</sub> H <sub>6</sub> O <sub>6</sub>                    | 149.00916 | Others       | Tartaric acid                            | -  | -  |                           |
| C <sub>4</sub> H <sub>8</sub> O <sub>5</sub>                    | 135.02990 | Others       | Threonic acid                            | +  | +  |                           |
| C <sub>7</sub> H <sub>5</sub> NS <sub>2</sub>                   | 165.97906 | Artificial   | 2-Mercaptobenzothiazol                   | -  | -  |                           |
| C <sub>14</sub> H <sub>22</sub> N <sub>2</sub> O <sub>3</sub>   | 265.15577 | Artificial   | Atenolol                                 | -  | -  |                           |
| C <sub>7</sub> H <sub>5</sub> NSO                               | 150.00191 | Artificial   | Benzisothiazolinone                      | -  | -  |                           |
| C <sub>15</sub> H <sub>16</sub> O <sub>2</sub>                  | 227.10775 | Artificial   | Bisphenol A                              | -  | -  |                           |
| C <sub>13</sub> H <sub>12</sub> O <sub>2</sub>                  | 199.07645 | Artificial   | Bisphenol F                              | -  | -  |                           |
| C <sub>15</sub> H <sub>12</sub> N <sub>2</sub> O                | 235.08769 | Artificial   | Carbamazepine                            | -  | -  |                           |
| C <sub>9</sub> H <sub>9</sub> N <sub>3</sub> O <sub>2</sub>     | 190.06220 | Artificial   | Carbendazim                              | -  | -  |                           |
| C <sub>17</sub> H <sub>21</sub> NO <sub>4</sub>                 | 303.14761 | Artificial   | Cocaine                                  | -  | -  |                           |

|                                                                |           |            |                      |   |   |  |
|----------------------------------------------------------------|-----------|------------|----------------------|---|---|--|
| C <sub>12</sub> H <sub>17</sub> NO                             | 190.12374 | Artificial | DEET                 | - | - |  |
| C <sub>16</sub> H <sub>22</sub> O <sub>4</sub>                 | 277.14453 | Artificial | Dibutyl phthalate    | - | - |  |
| C <sub>21</sub> H <sub>23</sub> NO <sub>5</sub>                | 368.15035 | Artificial | Heroin               | - | - |  |
| C <sub>20</sub> H <sub>25</sub> N <sub>3</sub> O               | 322.19249 | Artificial | LSD                  | - | - |  |
| C <sub>11</sub> H <sub>15</sub> NO <sub>2</sub>                | 192.10300 | Artificial | MDMA                 | - | - |  |
| C <sub>4</sub> H <sub>11</sub> N <sub>5</sub>                  | 128.09417 | Artificial | Metformin            | - | - |  |
| C <sub>4</sub> H <sub>5</sub> NSO                              | 114.00191 | Artificial | Methylisothiazolinon | - | - |  |
| C <sub>6</sub> H <sub>9</sub> N <sub>3</sub> O <sub>3</sub>    | 170.05712 | Artificial | Metronidazole        | - | - |  |
| C <sub>5</sub> H <sub>5</sub> NSO                              | 126.00191 | Artificial | Pyriothione          | - | - |  |
| C <sub>7</sub> H <sub>5</sub> NSO <sub>3</sub>                 | 181.99174 | Artificial | Saccharin            | - | - |  |
| C <sub>10</sub> H <sub>11</sub> N <sub>3</sub> SO <sub>3</sub> | 252.04484 | Artificial | Sulfamethoxazole     | - | - |  |
| C <sub>13</sub> H <sub>10</sub> N <sub>2</sub> O <sub>4</sub>  | 257.05678 | Artificial | Thalidomide          | - | - |  |
| C <sub>8</sub> H <sub>3</sub> N <sub>3</sub> SO <sub>4</sub>   | 246.05540 | Artificial | Tinidazole           | - | - |  |
| C <sub>9</sub> H <sub>6</sub> N <sub>2</sub> O <sub>2</sub>    | 173.03565 | Artificial | Toluene diisocyanate | - | - |  |
| C <sub>7</sub> H <sub>9</sub> N                                | 106.06622 | Artificial | Toluidine            | - | - |  |
| C <sub>7</sub> H <sub>5</sub> N <sub>3</sub> O <sub>6</sub>    | 226.01055 | Artificial | Trinitrotoluene      | - | - |  |
| C <sub>24</sub> H <sub>29</sub> N <sub>5</sub> O <sub>3</sub>  | 434.21976 | Artificial | Valsartan            | - | - |  |

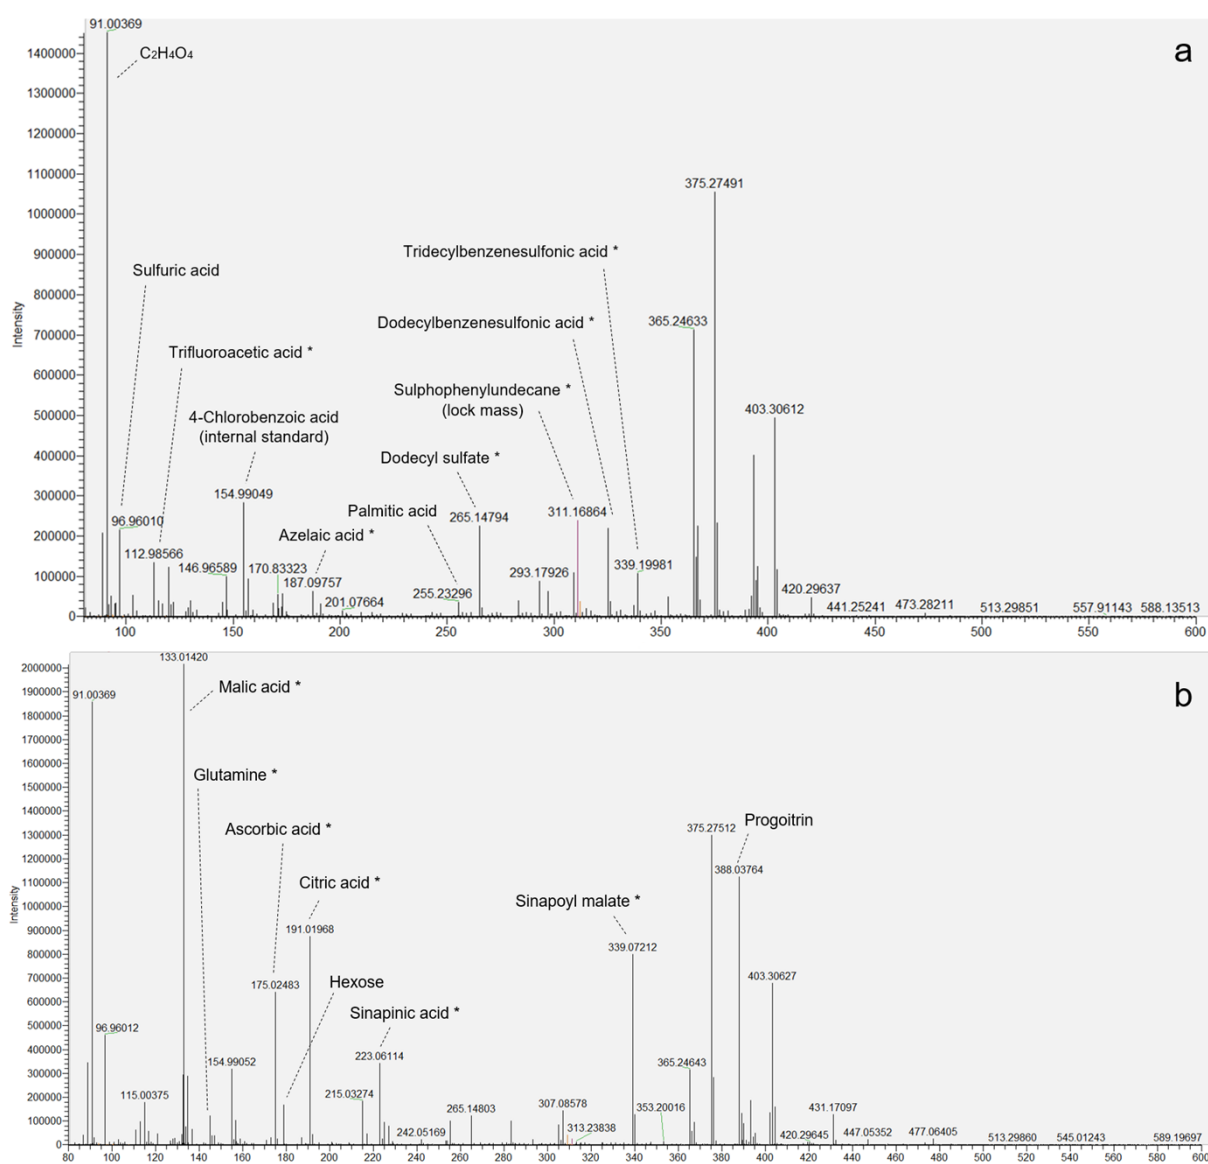

**Fig. S-1** Typical mass spectra acquired as described in the materials and methods section. Mass range shown:  $m/z$  80-600. Direct infusion with chip-based nano-electrospray ionization. Negative ion mode. Assignments marked with an asterisk \* were verified by MS/MS. **(a)** Solvent blank of ACN/water 90:10 with 0.1 % formic acid and 0.1 mg L<sup>-1</sup> 4-chlorobenzoic acid as internal standard. **(b)** Cotyledons of *Brassica napus* extracted for 60 seconds with 0.5 mL of ACN/water 90:10 containing 0.1 % formic acid and 0.1 mg L<sup>-1</sup> 4-chlorobenzoic acid as internal standard.

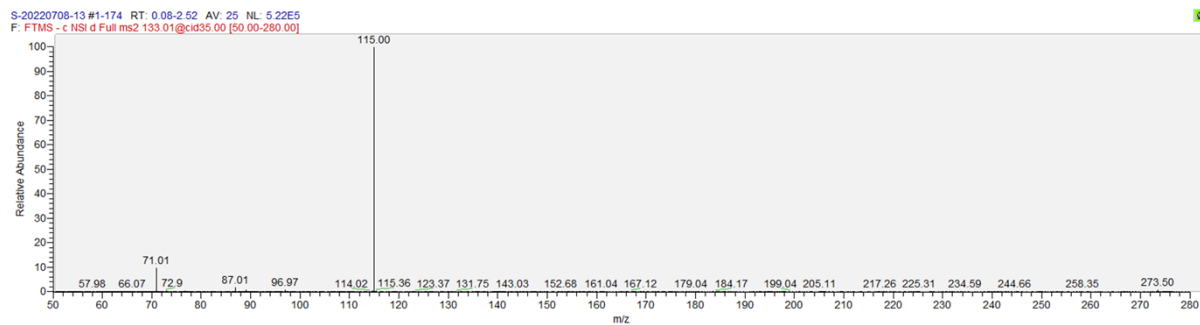

Fig. S-2 MS<sup>2</sup> spectrum of the signal at  $m/z$  133.01 (malic acid). Fragmentation was done with direct infusion in negative mode (ACN:H<sub>2</sub>O 90:10, 0.1 % FA).

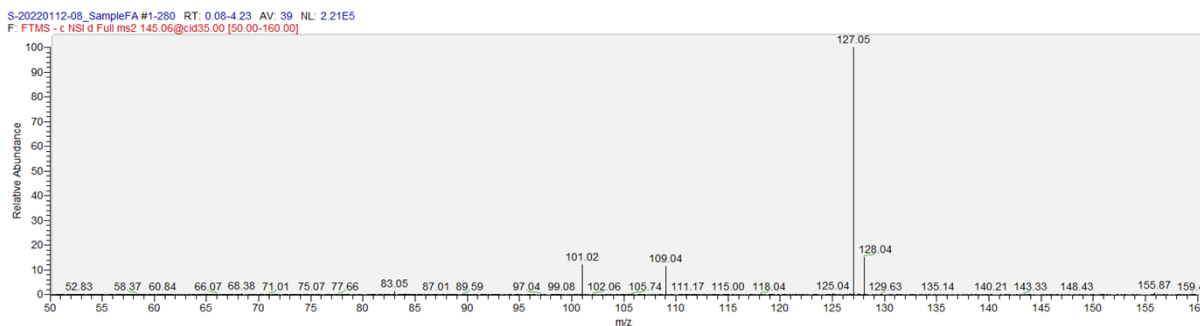

Fig. S-3 MS<sup>2</sup> spectrum of the signal at  $m/z$  145.06 (glutamine). Fragmentation was done with direct infusion in negative mode (ACN:H<sub>2</sub>O 90:10, 0.1 % FA).

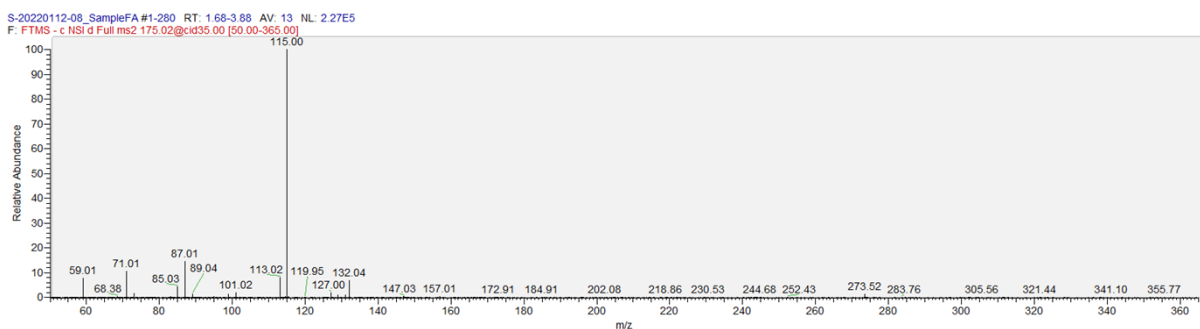

Fig. S-4 MS<sup>2</sup> spectrum of the signal at  $m/z$  175.02 (ascorbic acid). Fragmentation was done with direct infusion in negative mode (ACN:H<sub>2</sub>O 90:10, 0.1 % FA).

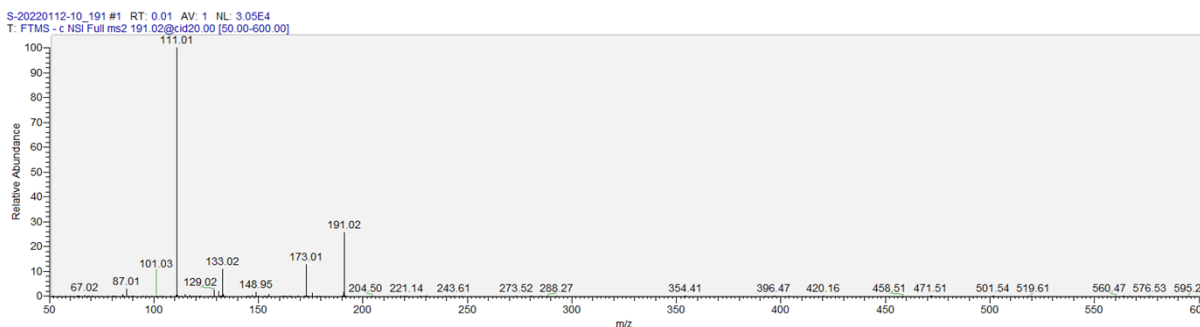

Fig. S-5 MS<sup>2</sup> spectrum of the signal at  $m/z$  191.02 (citric acid). Fragmentation was done with direct infusion in negative mode (ACN:H<sub>2</sub>O 90:10, 0.1 % FA).

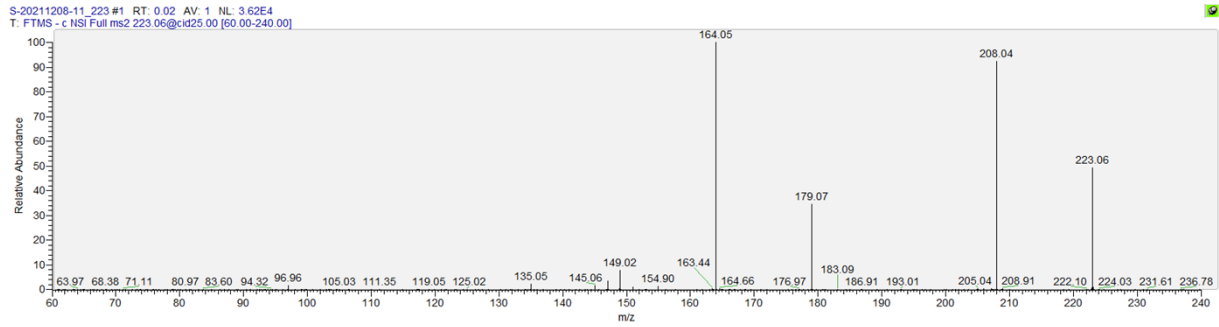

Fig. S-6 MS<sup>2</sup> spectrum of the signal at  $m/z$  223.06 (sinapinic acid). Fragmentation was done with direct infusion in negative mode (ACN:H<sub>2</sub>O 90:10, 0.1 % FA).

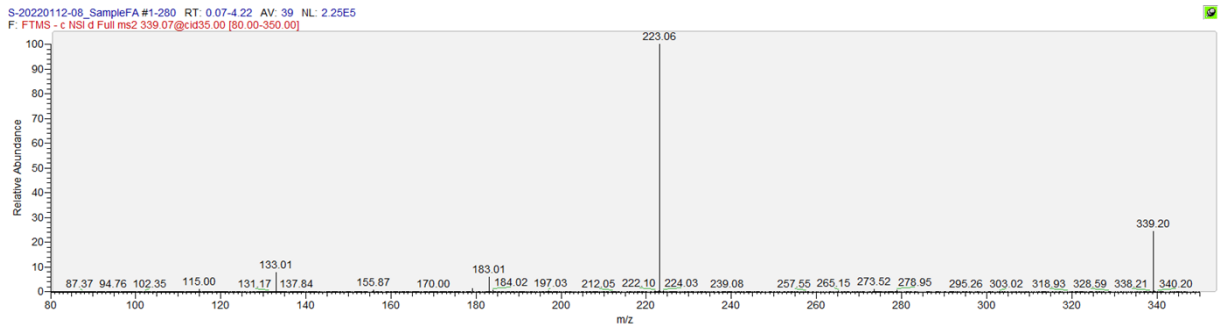

Fig. S-7 MS<sup>2</sup> spectrum of the signal at  $m/z$  339.07 (sinapoyl malate). Fragmentation was done with direct infusion in negative mode (ACN:H<sub>2</sub>O 90:10, 0.1 % FA).

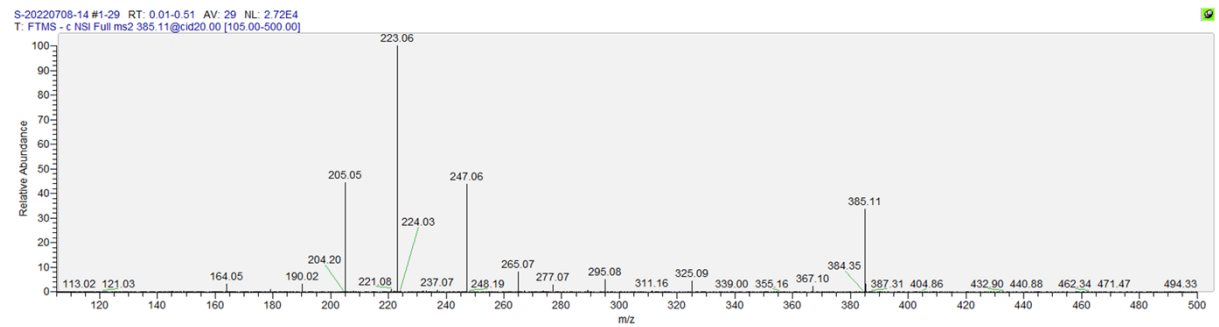

Fig. S-8 MS<sup>2</sup> spectrum of the signal at  $m/z$  385.11 (sinapoyl glucose). Fragmentation was done with direct infusion in negative mode (ACN:H<sub>2</sub>O 90:10, 0.1 % FA).
